1 Exogenous calcium ions enhance patulin adsorption capability of *Saccharomyces*  
2 *cerevisiae*

3

4 Ying Luo<sup>1</sup>, Xiaojiao Liu<sup>2,3</sup>, Yanqing Han<sup>4</sup>, Jianke Li<sup>1\*</sup>

5

6

7 <sup>1</sup> College of Food Engineering and Nutritional Science, Shaanxi Normal University,  
8 Xi'an, Shaanxi, 710119, China.

9 <sup>2</sup> College of Biomedicine and Food Engineering, Shangluo University, Shangluo,  
10 726000, China.

11 <sup>3</sup> College of Food Science and Engineering, Northwest A&F University, Yangling,  
12 712100, China.

13 <sup>4</sup> Xi'an Railway Signal Co., Ltd., Xi'an, Shaanxi, 710048, China.

14 \* Corresponding author: Prof. Jianke Li

15 E-mail address: [jiankel@snnu.edu.cn](mailto:jiankel@snnu.edu.cn)

16 Tel: +86-029-85310519

17 **Abstract**

18 Patulin contamination is a severe issue that restricts the development of the  
19 global fruit processing industry. Yeast adsorbs patulin more effectively than other  
20 microbial adsorbents, and this adsorption process mainly depends on the function of  
21 the cell wall. Additionally, exogenous calcium ions aid in yeast cell wall formation  
22 according to reports. Therefore, in the present study, the effect of exogenous calcium  
23 concentrations on the cell wall structure and the patulin adsorption capability was  
24 studied. We showed that the ability of the yeast to adsorb patulin was strengthened  
25 with an increase in exogenous calcium concentrations between  $1 \times 10^{-4}$  -  $1 \times 10^{-2}$  mol/L.  
26 Moreover, yeast cell wall thickness,  $\beta$ -1,3-glucan content and the activities of the key  
27 catalytic enzymes  $\beta$ -1,3-glucanase and  $\beta$ -1,3-glycosyl transferase were all increased  
28 within this range. The results indicated that exogenous calcium activates key enzymes  
29 and that these enzymes are crucial for cell wall network formation and patulin  
30 adsorption capability.

31 **Importance:**

32 The present work illuminates that the exogenous calcium ions could determine  
33 the insoluble network structure by regulating key enzyme activities under certain  
34 concentrations, thus indirectly influencing the yeast cell patulin adsorption capability.  
35 It could enhance patulin adsorption capability of yeast walls and successfully apply to  
36 fruit juice industry.

37 **Keywords:** Calcium, patulin, adsorption capability, yeast cell wall, apple juice

## 38 1. Introduction

39 Patulin is a kind of secondary metabolite produced by a wide range of fungi  
40 during their growth on rotting fruit. The presence of patulin in fruit and vegetable  
41 products, especially in apple products, has become a severe problem for food safety. It  
42 has been reported that approximately 50% of the analyzed samples showed relatively  
43 high detectable patulin levels in apple juice worldwide <sup>[1]</sup>. This mycotoxin causes  
44 acute and chronic damage in animal studies and in vitro experiments <sup>[2, 3]</sup>. Patulin was  
45 classified as a category 3 toxin by the International Agency for Research on Cancer <sup>[4]</sup>,  
46 and the European Union (EU) has recommended that the maximum patulin detection  
47 levels are 50 µg/kg for fruit juices and 10 µg/kg for infant products <sup>[5]</sup>.

48 To ensure fruit product safety, numerous approaches, including physical,  
49 chemical, and biological methods, have been developed to eliminate patulin  
50 occurrence. Biological adsorption has recently been considered the most effective  
51 strategy in the food industry. Yeast adsorption is considered to have a dominant role  
52 compared to other microorganisms due to its unique advantages, such as easier  
53 cultivation, lower cost, and lack of hazards <sup>[6]</sup>. Most yeast species, such as  
54 *Saccharomyces cerevisiae*, *Candida* spp., *Pichia* spp., and *Rhodotorula* spp., can  
55 adsorb patulin and other mycotoxins <sup>[6, 7]</sup>. The yeast cell wall allows cells to adsorb a  
56 range of compounds from the environment, and it was reported to be the major  
57 component for patulin adsorption. In addition, we could state that the β-glucans that  
58 make up the cell wall play an important role in patulin adsorption <sup>[8]</sup>. Yiannikouris and  
59 others indicated that yeast strains possess a larger number of β-glucans and a greater

60 amount of chitin and thus were able to adsorb larger amounts of mycotoxins <sup>[9]</sup>.  
61 Furthermore, the key factors in the yeast cell wall  $\beta$ -glucan and mycotoxin adsorption  
62 processes were identified as van der Waals and hydrophobic interactions <sup>[10]</sup>. Based on  
63 these facts, the interactions between the  $\beta$ -glucans and patulin are more of an  
64 adsorption type with physical interactions, and the three-dimensional network  
65 structure of  $\beta$ -glucans has an important role in the adsorption.

66 The yeast cell wall three-dimensional network structure mainly consists of  $\beta$ -1,3-  
67 and  $\beta$ -1,6-glucan chains linked to chitin and mannoproteins <sup>[11]</sup>. The network was  
68 identified as having uracil diphosphate-glucose (UDP-glucose) as its unique precursor  
69 substance, and  $\beta$ -1,3-glucan soluble chains were then biosynthesized utilizing  
70  $\beta$ -1,3-glucanase. Next,  $\beta$ -1,3-glucan insoluble chains were generated by cross-linking  
71 with chitin catalyzed by  $\beta$ -1,3-glycosyl transferase <sup>[12]</sup> (Figure 1). Some research  
72 indicated that adding an appropriate amount of calcium ions during the yeast growth  
73 process promoted  $\beta$ -1,3-glucan formation and the activity of  $\beta$ -1,3-glucanase,  
74 thus predicting that it may be associated with calcium signaling pathways <sup>[13]</sup>. Since  
75 calcium ions play a critical role as intracellular messengers in eukaryotic cells, they  
76 could allow the activation of the target protein calcineurin (CaN), which carries out  
77 multiple functions, including cell wall formation <sup>[14-16]</sup>. Nevertheless, the manner in  
78 which exogenous calcium influences the patulin adsorption capability of the yeast cell  
79 wall and the specific relationship between them have rarely been reported.

80 To explore the relationship between the exogenous calcium concentration and  
81 patulin adsorption capability of the yeast, this study aims to 1) verify the effect of

82 exogenous calcium concentrations on the yeast cell wall yield and cell wall thickness,  
83 2) illuminate the role of exogenous calcium concentrations on yeast cell wall  
84  $\beta$ -1,3-glucan content and  $\beta$ -1,3-glucanase activity, and 3) analyze the patulin  
85 adsorption improvement mechanism.

## 86 **2. Materials and methods**

### 87 2.1 Materials and reagents

88 Standards of patulin, standard  $\beta$ -glucan, and calcium chloride were all purchased  
89 from Sigma-Aldrich (St. Louis, MO, USA). *Saccharomyces cerevisiae* ATCC 18824  
90 was purchased from the American Type Culture Collection. Fluo 3-AM, and Pluronic  
91 F127 were obtained from Solarbio (Beijing, China). Other chemicals used in the  
92 experiments were all obtained from a local chemical reagent company. All chemical  
93 reagents were of analytical grade, and the solutions were prepared with deionized  
94 water.

### 95 2.2 Different concentrations of exogenous calcium and the preparation of cultivated 96 yeast cells preparation

97 Yeast cells were cultivated in yeast extract peptone dextrose medium (YPD  
98 culture medium: glucose 2%, peptone 2% and yeast extract powder 1%) at 120 rpm,  
99 30°C for 24 h. After cultivation was activated, yeast cells (5% inoculum size) were  
100 inoculated into calciferous YPD culture media with exogenous calcium concentrations  
101 ranging from  $1 \times 10^{-4}$  mol/L to 1 mol/L (120 rpm, 30°C for 24 h). After calcium  
102 cultivation, the cells were collected by centrifugation and washed twice with sterilized  
103 water. To analyze the yeast cell biomass (g/L), the cells were collected from 1000 mL

104 of cell suspension and weighed after being freeze-dried to a constant weight.

### 105 2.3 Intracellular calcium concentration determination

106 To determine the intracellular calcium concentration, yeast protoplasts cultivated  
107 in different amounts of calcium were incubated at 37°C for 30 min with the addition  
108 of the calcium fluorescence probe Fluo 3-AM. Cells loaded with Fluo 3-AM then  
109 adhered to microscope slides using polylysine. Laser confocal fluorescence  
110 microscopy was used to determine the concentration of intracellular calcium. The  
111 excitation and emission wavelengths of Fluo 3-AM were 488 nm and 525 nm,  
112 respectively.

### 113 2.4 Cell wall morphology and thickness analysis

114 The cell wall thickness was determined using transmission electron microscopy  
115 (TEM) (JEOL-1230; JEOL Ltd., Japan). Different calcium-cultivated yeast cells were  
116 used to prepare the specimens for TEM. Thirty cells were randomly selected from five  
117 different fields of view. For each cell, four different points were measured. The cell  
118 wall thickness statistics were obtained using a frequency histogram.

### 119 2.5 Cell wall network structure components analysis

120 Different calcium-cultivated yeast cells were disrupted using an ultrasonic cell  
121 disruption system (Scientz-IID, Ningbo Xinzhi Biotechnology Co., Ltd.). For  
122 1,3- $\beta$ -glucan and 1,6- $\beta$ -glucan extraction and purification, the cell wall fractions were  
123 extracted with NaOH at 75°C. The alkali-insoluble and alkali-soluble glucans were  
124 1,3- $\beta$ -glucan and 1,6- $\beta$ -glucan, respectively <sup>[17]</sup>. A Dionex Bio-LC system (ICS2500,  
125 USA) coupled with an ED 50 electrochemical detector was used to quantitatively

126 analyze the cell wall carbohydrates. Deionized water: 0.5 mol/L NaOH (3.5: 96.5; v/v)  
127 was used as the isocratic mobile phase with a flow rate of 1 mL/min at room  
128 temperature. The chitin content was determined using an enzymatic method as  
129 described in other reports <sup>[18]</sup>.

## 130 2.6 Extraction and activity determination of $\beta$ -glucanase and $\beta$ -1,3-glycosyl 131 transferase

132 A spectrophotometric method was used to detect  $\beta$ -glucanase activity.  
133 Resuspended yeast cells grown in differing concentrations of calcium had their cell  
134 walls disrupted with glass beads. The samples diluted with phosphate buffer were  
135 mixed with lichenan at 50°C for 10 min, and 3,5-dinitrosalicylic acid was then added  
136 and boiled for 5 min. Spectrophotometry was used to measure the  $\beta$ -glucanase  
137 activities at 520 nm ultraviolet wavelength after the samples had cooled. A specific  
138 assay kit was prepared to detect  $\beta$ -1,3-glycosyl transferase activity after cell walls  
139 disrupted with glass beads.

## 140 2.7 Patulin adsorption and analysis in aqueous solution and apple juice

141 Different concentrations of calcium-cultivated yeast cells were suspended in 200  
142  $\mu$ g/L aqueous solution (1 mL) and patulin-contaminated apple juice (10 mL) with  
143  $10^6$ /mL and 100 mg yeast cell addition, respectively. The cells were incubated for 10 h  
144 (150 rpm at room temperature) in a shaker incubator. The control sample lacked  
145 added cells. Three replications were prepared for each sample, and the independent  
146 experiments were performed three times. After 10 h, the cells were separated by  
147 centrifugation at  $3600\times g$  for 5 min, and the supernatants were then collected to extract

148 and detect patulin <sup>[19]</sup>. Patulin was analyzed by high-performance liquid  
149 chromatography (HPLC), separated by a C18 reversed-phase column, and detected  
150 using HPLC connected with a UV absorbance detector set at 276 nm. An acetonitrile:  
151 water solution (10: 90) was used as the isocratic mobile phase with a flow rate of 1  
152 mL/min at 30°C, and the elution time was 15 min for each sample <sup>[20]</sup>. The patulin  
153 adsorption efficiency (R%) was calculated using the following equation:

$$154 \quad R\% = \frac{(C_0 - C_f)}{C_0} \times 100 \quad (1)$$

155 where  $C_0$  and  $C_f$  are the initial and final concentrations of patulin (mg/L),  
156 respectively.

## 157 2.8 Statistical analysis

158 The experiments were generally performed in triplicate, and the data are  
159 presented as the mean  $\pm$  standard deviation. All data were subjected to one-way  
160 ANOVA using the Statistical Analysis System (SAS Inst., Cary, N.C., U.S.A.). The  
161 data were considered statistically significant when  $p < 0.05$ .

## 162 3. Results and discussion

163 3.1 The effect of exogenous calcium concentrations on yeast cells and cell wall  
164 biomass

165 The calcium ion is an essential element that serves as an intracellular messenger  
166 in yeast cells <sup>[21]</sup>. Adding exogenous calcium during yeast growth contributes to the  
167 activation of the calcium pathway, thus regulating cell growth and cell wall synthesis  
168 <sup>[22]</sup>. Changes in yeast cells and their cell wall biomass cultivated with different  
169 concentrations of exogenous calcium are compared in Figure 2. Yeast cell and cell



170 wall biomass were positively correlated with exogenous calcium concentrations at a  
171 range from  $1 \times 10^{-4}$  mol/L to  $1 \times 10^{-2}$  mol/L, with the highest biomass of 3.93 g/L for the  
172 yeast cells and 0.38 g/L for the cell walls at the calcium concentration of  $1 \times 10^{-2}$  mol/L.  
173 With calcium concentrations continuing to increase, the yeast cell biomass  
174 subsequently decreased slightly at a calcium concentration of  $1 \times 10^{-1}$  mol/L and then  
175 decreased rapidly when the calcium concentration increased to 1 mol/L with a  
176 biomass of only 1.34 g/L. However, the cell wall biomass suddenly decreased from  
177  $1 \times 10^{-1}$  to 1 mol/L, finally dropping to 0.24 g/L. The results indicated that exogenous  
178 calcium could enhance yeast and yeast cell wall growth in a certain extent and that the  
179 most effective concentration was  $1 \times 10^{-2}$  mol/L.

### 180 3.2 Intracellular calcium concentration determination

181 To confirm the effect of activation of exogenous calcium on the intracellular  
182 calcium pathway, the intracellular calcium concentration and the relation between  
183 intra- and extracellular calcium were determined. The fluorescence intensities of  
184 cytosolic free calcium in different exogenous calcium culture cells were determined at  
185 the same cell concentration of  $1 \times 10^5$ /mL, and the results are shown in Figure 3. The  
186 relative intensity of cytosolic free calcium apparently intensified with increasing  
187 exogenous calcium concentrations to a certain extent, ranging from  $1 \times 10^{-4}$  to  $1 \times 10^{-2}$   
188 mol/L. However, the fluorescence intensity of the cytosolic free calcium became weak  
189 and ultimately disappeared with the increase in the exogenous calcium concentration.  
190 The intracellular calcium had the highest concentration when the exogenous calcium  
191 concentration was  $1 \times 10^{-2}$  mol/L. This is due to the existence of a calcium steady-state

192 system in *Saccharomyces cerevisiae*. During conditions of high exogenous calcium  
193 ion concentrations, the exogenous calcium ions could enter the yeast cells aided by  
194 transporter proteins <sup>[23, 24]</sup>. However, under conditions of excessive intracellular  
195 calcium concentrations, the redundant calcium was partially transported into vacuoles  
196 using vacuolar proton pumps, and the other portion was transported extracellularly  
197 using Golgi/endoplasmic calcium pumps <sup>[25]</sup>.

### 198 3.3 The effect of exogenous calcium concentration on cell wall thickness

199 The ultrastructures of different exogenous calcium cultivated cells are shown in  
200 the TEM images at 25,000 × magnification (80.0 kv, 10.0 μA) in Figure 4, and the  
201 frequency histogram is used to calculate cell wall thickness (Figure 5). TEM images  
202 obviously displayed the tightness and thickness of the cell wall, and the cell wall  
203 thickness increased in parallel with the increasing calcium concentrations compared to  
204 the control group. However, the thickness reached its peak when the concentration of  
205 calcium added was  $1 \times 10^{-2}$  mol/L and then decreased as the calcium concentration  
206 continuously increased. In image *f* of the maximum calcium addition (1 mol/L), it  
207 appears that the cell wall layer was thinner and most easily damaged. The cell wall  
208 thickness values were determined by combining with the thickness statistics. The  
209 thickness values increased from 66.9 nm to 210.54 nm at  $1 \times 10^{-2}$  mol/L, and then  
210 decreased to 99.46 nm at the maximum calcium addition of 1 mol/L. These results  
211 indicated that the exogenous addition of calcium contributes to yeast cell wall layer  
212 formation to a certain degree because the increasing intracellular calcium could  
213 trigger the formation of the  $\text{Ca}^{2+}$ -calcineurin complex in the cytoplasm, thus

214 activating calcineurin <sup>[26]</sup>. The activated calcineurin affected the formation of the cell  
215 wall by phosphorylating the transcription factor *crz1* and then regulating the  
216 expression of multiple downstream calcineurin-dependent genes <sup>[27, 28]</sup>.

217 3.4 The effect of exogenous calcium concentrations on the yeast cell wall insoluble  
218 network structure

219 Yeast cell walls are considered to be made up of different glucan types with  
220 different solubility properties. The solubility properties of yeast cell wall glucan had a  
221 direct relationship with the existence of chitin. Chitin, with its content less than 3%,  
222 connected with glucan by covalent bonds and could change soluble glucan to an  
223 insoluble state <sup>[29]</sup>. Therefore, many studies have been conducted on the network  
224 structure composed of  $\beta$ -glucans ( $\beta$ -1,3-glucans and  $\beta$ -1,6-glucans) and chitin <sup>[18]</sup>.  
225 Different exogenous calcium-cultivated cell wall network compositions were  
226 analyzed in this study, and the results of the  $\beta$ -1,3-glucan,  $\beta$ -1,6-glucan, and chitin  
227 contents are shown in Figure 6. As seen from the illustration, the  $\beta$ -glucan and chitin  
228 contents increased as the exogenous calcium concentration increased from  $1 \times 10^{-4}$  to  
229  $1 \times 10^{-2}$  mol/L compared to the controls. Their contents then started to decrease at  
230  $1 \times 10^{-1}$  mol/L, with a sudden drop at the calcium concentration of 1 mol/L. It  
231 displayed a similar trend with the results of the cell wall biomass and cell wall  
232 thickness since the insoluble  $\beta$ -glucan content influenced the density and thickness of  
233 the network structure and cell wall formation <sup>[11]</sup>.

234 3.5 The effect of exogenous calcium concentration on the activities of  $\beta$ -1,3-glucanase  
235 and  $\beta$ -1,3-glycosyl transferase

236 The cell wall network structure is biosynthesized with uracil diphosphate glucose  
237 as the only precursor substance and it then synthesizes long-chain soluble  $\beta$ -glucans  
238 utilizing  $\beta$ -1,3-glucanase, eventually forming insoluble  $\beta$ -glucans with chitin  
239 mediated by  $\beta$ -1,3-glycosyl transferase. Consequently, the activities of  
240  $\beta$ -1,3-glucanase and  $\beta$ -1,3-glycosyl transferase play important roles during cell wall  
241 network structure formation <sup>[12]</sup>. The effect of exogenous calcium concentrations on  
242 the  $\beta$ -1,3-glucanase and  $\beta$ -1,3-glycosyl transferase activities are shown in Figure 7. As  
243 shown in the figure, the activities of  $\beta$ -1,3-glucanase and  $\beta$ -1,3-glycosyl transferase  
244 increased as the exogenous calcium concentration increased within the concentration  
245 of  $1 \times 10^{-2}$  mol/L, and the results concurred with those observed in other studies <sup>[13]</sup>. As  
246 the exogenous calcium concentration continued to increase ( $1 \times 10^{-1}$  mol/L), the  
247 excessive calcium could act as osmotic pressure, which is harmful for yeast cells. The  
248 cell would be forced to stop its calcium response to promote the high osmotic pressure  
249 glycerol response (HOG) pathway since a high osmotic stress response attempts to  
250 repair the molecular damage and adapt to the new environment <sup>[30, 31]</sup>. At this point,  
251  $\beta$ -1,3-glucanase and  $\beta$ -1,3-glycosyl transferase, which are regulated by calcium  
252 signals, would suffer a sudden decrease, subsequently causing insoluble  $\beta$ -glucans and  
253 cell wall thickness and even a decrease in the cell wall and yeast biomass.

### 254 3.6 The effect of exogenous calcium concentration on patulin adsorption capability

255 The results of the patulin adsorption with different amounts of exogenous  
256 calcium-cultivated yeast cells are shown in Figure 8. All the cells tested could  
257 efficiently adsorb patulin from the aqueous solution and the apple juice, and the

258 patulin adsorption ratios increased in parallel with the exogenous calcium  
259 concentration that increased within  $1 \times 10^{-2}$  mol/L. Patulin adsorption ratios increased  
260 from 83.4% to 94.8% in aqueous solution and from 76.2% to 85.9% in apple juice.  
261 Subsequently, the patulin adsorption ratios slightly decreased at  $1 \times 10^{-1}$  mol/L, with  
262 the adsorption ratios 92.5% and 83.7% in the aqueous solution and the apple juice,  
263 respectively. As the calcium ion concentration continued to increase to 1 mol/L, the  
264 patulin adsorption capability of the yeast cells dropped precipitously either in the  
265 aqueous solution or in the apple juice. It was evident that the effect of exogenous  
266 calcium on the patulin adsorption capability of the yeast cells was significant because  
267 the cell wall network structure and thickness changed with exogenous calcium  
268 concentration. The adsorption capability of the patulin increased in parallel with the  
269 density of the cell wall network structure <sup>[8]</sup>. It can also be seen that the patulin  
270 adsorption capability of the yeast cells is greater in aqueous solutions. This is due to  
271 the nonspecific adsorption characteristic of yeast cells. In apple juice, a certain  
272 amount of pigments could be adsorbed as well, and they competed with the adsorption  
273 sites for patulin, thus removing the available adsorption sites in the yeast cell wall  
274 associated with patulin <sup>[6]</sup>.

#### 275 **4. Conclusion**

276 In this study, we have shown that exogenous calcium ions can improve the  
277 patulin adsorption capability of the yeast cell. This is the first report demonstrating a  
278 relationship between the calcium ion and patulin adsorption. Previous studies revealed  
279 that the patulin adsorption capability of yeast cells was primarily based on the cell

280 wall filamentous network structure, and the adsorption process was considered to be  
281 due to the insertion of the free patulin adsorbed into the network pore structure <sup>[8]</sup>.  
282 This peculiar network structure is formed with  $\beta$ -1,3-glucan and chitin, which were  
283 controlled by the activities of  $\beta$ -1,3-glucanase and  $\beta$ -1,3-glycosyl transferase <sup>[12]</sup>. In  
284 the present study, research on the improvement of the ability to adsorb patulin was  
285 conducted by adding different concentrations of exogenous calcium ions during yeast  
286 growth. A series of experiments showed that the exogenous calcium ions could  
287 determine the insoluble network structure by regulating key enzyme activities under  
288 certain concentrations, thus indirectly influencing the yeast cell patulin adsorption  
289 capability.

290 We preliminarily speculated on the mechanisms of the improvement in the  
291 patulin adsorption capability from our results. An appropriate amount of exogenous  
292 calcium ions entered the yeast cell with the aid of transporter proteins on the cell  
293 membranes and subsequently activated the calcineurin pathway by combining with  
294 the target protein calcineurin <sup>[24]</sup>. Furthermore, the activated calcineurin carried out  
295 multiple functions, including upregulating some genes that encode key enzymes  
296 associated with cell wall formation <sup>[16, 32]</sup>. Nonetheless, superabundant exogenous  
297 calcium ions posed a threat to yeast cells since a high osmotic pressure glycerol  
298 response (HOG) pathway would be activated to respond to the superabundant calcium  
299 stress.

300 On the basis of this study, more questions raised require further study. For  
301 example, it is not clear whether exogenous calcium activates the calcineurin pathway

302 to determine the patulin adsorption capability of the yeast cells. Additionally, it is  
303 unclear whether the decisive results obtained were mediated by a gene *crz1* regulatory  
304 effect. Intriguingly, one study showed that the  $\beta$ -1,3-glucanase regulatory gene *gsc2*  
305 and  $\beta$ -1,3-glycosyl transferase regulatory gene *crh1* were probably calcineurin  
306 dependent, and their activation and expression may be affected by the  
307 calcineurin/Crz1 pathway <sup>[22]</sup>. Thus, determining if the key genes *gsc2* and *crh1* are  
308 upregulated with the concentration of exogenous calcium in *S. cerevisiae* would be of  
309 interest. Further studies to elucidate the calcineurin/Crz1 pathway and *crz1* gene  
310 expression driven by exogenous calcium are needed.

### 311 **Acknowledgments**

312 This work was supported by “China Postdoctoral Science Foundation Funded  
313 Project” (2017M613055), “Postdoctoral Science Foundation Funded Project of  
314 Shaanxi Province” (2017BSHYDZZ46), and “The Fundamental Research Funds for  
315 the Central Universities” (GK201703066).

### 316 **Author Contributions**

317 Conceptualization, Jianke Li; Methodology, Ying Luo; Software, Yanqing Han;  
318 Validation, Ying Luo, Xiaojiao Liu, Yanqing Han, and Jianke Li; Investigation, Ying  
319 Luo and Xiaojiao Liu; Data Curation, Ying Luo; Writing – Original Draft Preparation,  
320 Ying Luo; Writing – Review & Editing, Ying Luo and Xiaojiao Liu; Supervision,  
321 Jianke Li; Funding Acquisition, Ying Luo.

### 322 **Conflict of interest**

323 The authors declare that they have no conflict of interest.

324 **References**

- 325 1. Marin S, Mateo EM, Sanchis V, Valle-Algarr F M, Ramos A J, Jiménez M. 2011.  
326 Patulin contamination in fruit derivatives, including baby food, from the Spanish  
327 market. *Food Chem* 124: 563-568.
- 328 2. Wichmann G, Herbarth O, Lehmann I. 2002. The mycotoxins citrinin, gliotoxin,  
329 and patulin affect interferongamma rather than interleukin-4 production in human  
330 blood cells. *Environ. Toxicol* 17: 211-218.
- 331 3. Drusch S, Kopka S, Kaeding J. 2007. Stability of patulin in a juice-like  
332 aqueousmodel system in the presence of ascorbic acid. *Food Chem* 100(1):  
333 192-197.
- 334 4. International Agency for Research on Cancer (IARC). 1993b. Monographs on the  
335 evaluation of carcinogenic risks of chemicals to humans. Lyon, France, 56:  
336 489-521.
- 337 5. European Union. 2006. Commission regulation no. *1425/2003* amending  
338 commission regulation no. *1881/2006* setting maximum levels for certain  
339 contaminants in foodstuffs. Brussels Belgium L203: 1-3364.
- 340 6. Luo Y, Wang ZL, Yuan YH, Zhou ZK, Yue TL. 2015(a). Patulin adsorption of a  
341 superior microorganism strain with low flavor-affection of kiwi fruit juice. *World*  
342 *Mycotoxin J* 9(2): 195-203.
- 343 7. Var I, Erginkaya Z, Kabak B. 2009. Reduction of OTA levels in white wine by  
344 yeast treatments. *J I Brewing* 115: 30-34.
- 345 8. Luo Y, Wang JG, Liu B, Wang ZL, Yuan YH, Yue TL. 2015(b). Effect of yeast cell



- 346 morphology, cell wall physical structure and chemical composition on patulin  
347 adsorption. Plos one 10(8): 1-16.
- 348 9. Yiannikouris A, Francois J, Poughon L, Dussap CG, Bertin G, Jeminet G, Pouany J.  
349 2004(a). Adsorption of zearalenone by  $\beta$ -D-Glucans in the *Saccharomyces*  
350 *cerevisiae* cell wall. J Food Prot 67(6): 1195-1200.
- 351 10. Jouany JP, Yiannikouris A, Bertin G. 2005. The chemical bonds between  
352 mycotoxins and cell wall components of *Saccharomyces cerevisiae* have been  
353 identified. Archiva Zootechnica 8: 26-50.
- 354 11. Klis FM, Boorsma A, De Groot PW. 2006. Cell wall construction in  
355 *Saccharomyces cerevisiae*. Yeast 23: 185-202.
- 356 12. Mo HZ, Liu XY, Hu YJ. 2007. Advances in  $\beta$ -1,3-glucans biosynthesis of  
357 *Saccharomyces cerevisiae*s. Food Sci 28(5): 358-362.
- 358 13. Li H. 2008. The purification, characteristic, and cDNA clone of  $\beta$ -1,3-glucanase in  
359 *Thermophilus*. Doctoral thesis. Shandong Agricultural University, Taian, China.
- 360 14. Cyert MS. 2003. Calcineurin signaling in *Saccharomyces cerevisiae*: how yeast go  
361 crazy in response to stress. Biochem Bioph Res Co 311: 1143-1150.
- 362 15. Miyakawa T, Mizunuma M. 2007. Physiological roles of calcineurin in  
363 *Saccharomyces cerevisiae* with special emphasis on its roles in G2/M cell-cycle  
364 regulation. Biosci Biotech Bioch 71: 633-645.
- 365 16. Ferreira RT, Courelas Silva, AR, Pimentel C, Batista-Nascimento L,  
366 Rodrigues-Pousada C, Menezes RA. 2012. Arsenic stress elicits cytosolic  $Ca^{2+}$   
367 bursts and Crz1 activation in *Saccharomyces cerevisiae*. Microbiology 158:

- 368 2293-2302.
- 369 17. Manners DJ, Masson AJ, Patterson JC. 1973. The structure of a  $\beta$ -(1–3)-D-glucan  
370 from yeast cell walls. *Biochem J* 135: 19-30.
- 371 18. Yiannikouris A, Francois J, Poughon L, Dussap CG, Bertin G, Jeminet G, Pouany  
372 J. 2004(b). Alkali extraction of  $\beta$ -D-Glucans from *Saccharomyces cerevisiae* cell  
373 wall and study of their adsorptive properties toward zearalenone. *J Agri Food Chem*  
374 52: 3666-3673.
- 375 19. MacDonald S, Long M, Gilbert J, Felgueiras I. 2000. Liquid chromatographic  
376 method for determination of patulin in clear and cloudy apple juices and apple  
377 puree: Collaborative study. *J AOAC Int* 83: 1387-1394.
- 378 20. Luo Y, Zhou ZK, Yue TL. 2017. Synthesis and characterization of nontoxic  
379 chitosan-coated  $\text{Fe}_3\text{O}_4$  particles for patulin adsorption in a juice-pH simulation  
380 aqueous. *Food Chem* 221: 317-323.
- 381 21. Rita TF, Ana RC, Catarina P, Liliana BN, Claudina R, Regina AM. 2012. Arsenic  
382 stress elicits cytosolic  $\text{Ca}^{2+}$  bursts and Crz1 activation in *Saccharomyces cerevisiae*.  
383 *Microbiology* 158: 2293-2302.
- 384 22. Guillaume L, Howard B. 2006. Cell wall assembly in *Saccharomyces cerevisiae*.  
385 *Microbio Mol Biol R* 70 (2): 317-343.
- 386 23. Cui J, Kaandorpa JA, Ositelub O, Beaudry V, Knight A, Nanfacka YF,  
387 Cunningham KW. 2009. Simulating calcium influx and free calcium concentrations  
388 in yeast. *Cell Calcium* 45: 123-132.
- 389 24. Martin DC, Kim H, Mackin NA, Maldonado-Báez L, Evangelista CJ, Beaudry

- 390 VG. 2011. New regulators of a high affinity Ca<sup>2+</sup> influx system revealed through a  
391 genome-wide screen in yeast. *J Biol Chem* 286(12): 10744-10754.
- 392 25. Demaegd D, Foulquier F, Colinet AS, Gremillon L, Legrand D, Mariot P. 2013.  
393 Newly characterized Golgi-localized family of proteins is involved in calcium and  
394 pH homeostasis in yeast and human cells. *P Natl Acad Sci USA* 110(17): 6859-64.
- 395 26. Berchtold MW, Villalobo A. 2014. The many faces of calmodulin in cell  
396 proliferation, programmed cell death, autophagy, and cancer. *Acta Bioch Bioph Sin*  
397 1843: 398-435.
- 398 27. Clapperton JA, Martin SR, Smerdon SJ, Gamblin SJ, Bayley PM. 2002. Structure  
399 of the complex of calmodulin with the target sequence of calmodulin-dependent  
400 protein kinase I: studies of the kinase activation mechanism. *Biochem* 41:  
401 14669-14679.
- 402 28. Karababa M, Valentino E, Pardini G. 2006. Crz1, a target of the calcineurin  
403 pathway in *Candida albicans*. *Mol Microbiol* 59(5): 1429-1451.
- 404 29. Klis FM, Mol P, Hellingwerf K. 2002. Dynamic of cell wall structure in  
405 *Saccharomyces cerevisiae*. *FEMS Microbiol Rev* 26: 239-256.
- 406 30. Nissen, T. L., Hamann, C. W., Kielland-Brandt, M. C., Nielsen, J., Villadsen, J.  
407 Anaerobic and aerobic batch cultivations of *Saccharomyces cerevisiae* mutants  
408 impaired in glycerol synthesis. *Yeast*. 2000, 16 (5): 463-474.
- 409 31. Rebeca AM, Eliana R, Iwona W, Jan-Paul B, Willem HM, Marco S. 2001.  
410 Hyperosmotic stress response and regulation of cell wall integrity in  
411 *Saccharomyces cerevisiae* share common functional aspects. *Mol Microbiol* 41(3):

412 717-730.

413 32. Araki Y, Wu H, Kitagaki H, Akao T, Takagi H, Shimo H. 2009. Ethanol stress  
414 stimulates the  $\text{Ca}^{2+}$ -mediated calcineurin/Crz1 pathway in *Saccharomyces*  
415 *cerevisiae*. J Biosci Bioeng 107(1): 1-6.

416 **Figure captions**

417 Figure 1 Yeast cell wall network structure biosynthesis and key enzymes  
418 involvement.

419 Figure 2 Different exogenous calcium culture cell biomass and cell wall biomass  
420 determination. Bars marked with different lowercase letters are significantly different  
421 ( $p < 0.05$ ).

422 Figure 3 The fluorescence intensities of cytosolic free calcium in different exogenous  
423 calcium culture cells (a, b, c, d, e and f were 0,  $1 \times 10^{-4}$ ,  $1 \times 10^{-3}$ ,  $1 \times 10^{-2}$ ,  $1 \times 10^{-1}$ , and  
424 1mol/L, respectively).

425 Figure 4 TEM images of different exogenous calcium culture cells at  $25,000 \times$   
426 magnification (a, b, c, d, e and f were 0,  $1 \times 10^{-4}$ ,  $1 \times 10^{-3}$ ,  $1 \times 10^{-2}$ ,  $1 \times 10^{-1}$ , and  
427 1mol/L, respectively).

428 Figure 5 Histogram statistical results of different exogenous calcium culture cell wall  
429 thickness (a, b, c, d, e and f were 0,  $1 \times 10^{-4}$ ,  $1 \times 10^{-3}$ ,  $1 \times 10^{-2}$ ,  $1 \times 10^{-1}$ , and 1mol/L,  
430 respectively).

431 Figure 6 Different exogenous calcium culture cell wall insoluble network structure  
432 composition analysis. Bars marked with different lowercase letters are significantly  
433 different ( $p < 0.05$ ).

434 Figure 7 The activities of  $\beta$ -1,3-glucanase and  $\beta$ -1,3-glycosyl transferase in different  
435 exogenous calcium culture cells.

436 Figure 8 Patulin adsorption in aqueous solution and commercial apple juice by  
437 different exogenous calcium culture cells. Bars marked with different lowercase  
438 letters are significantly different ( $p < 0.05$ ).

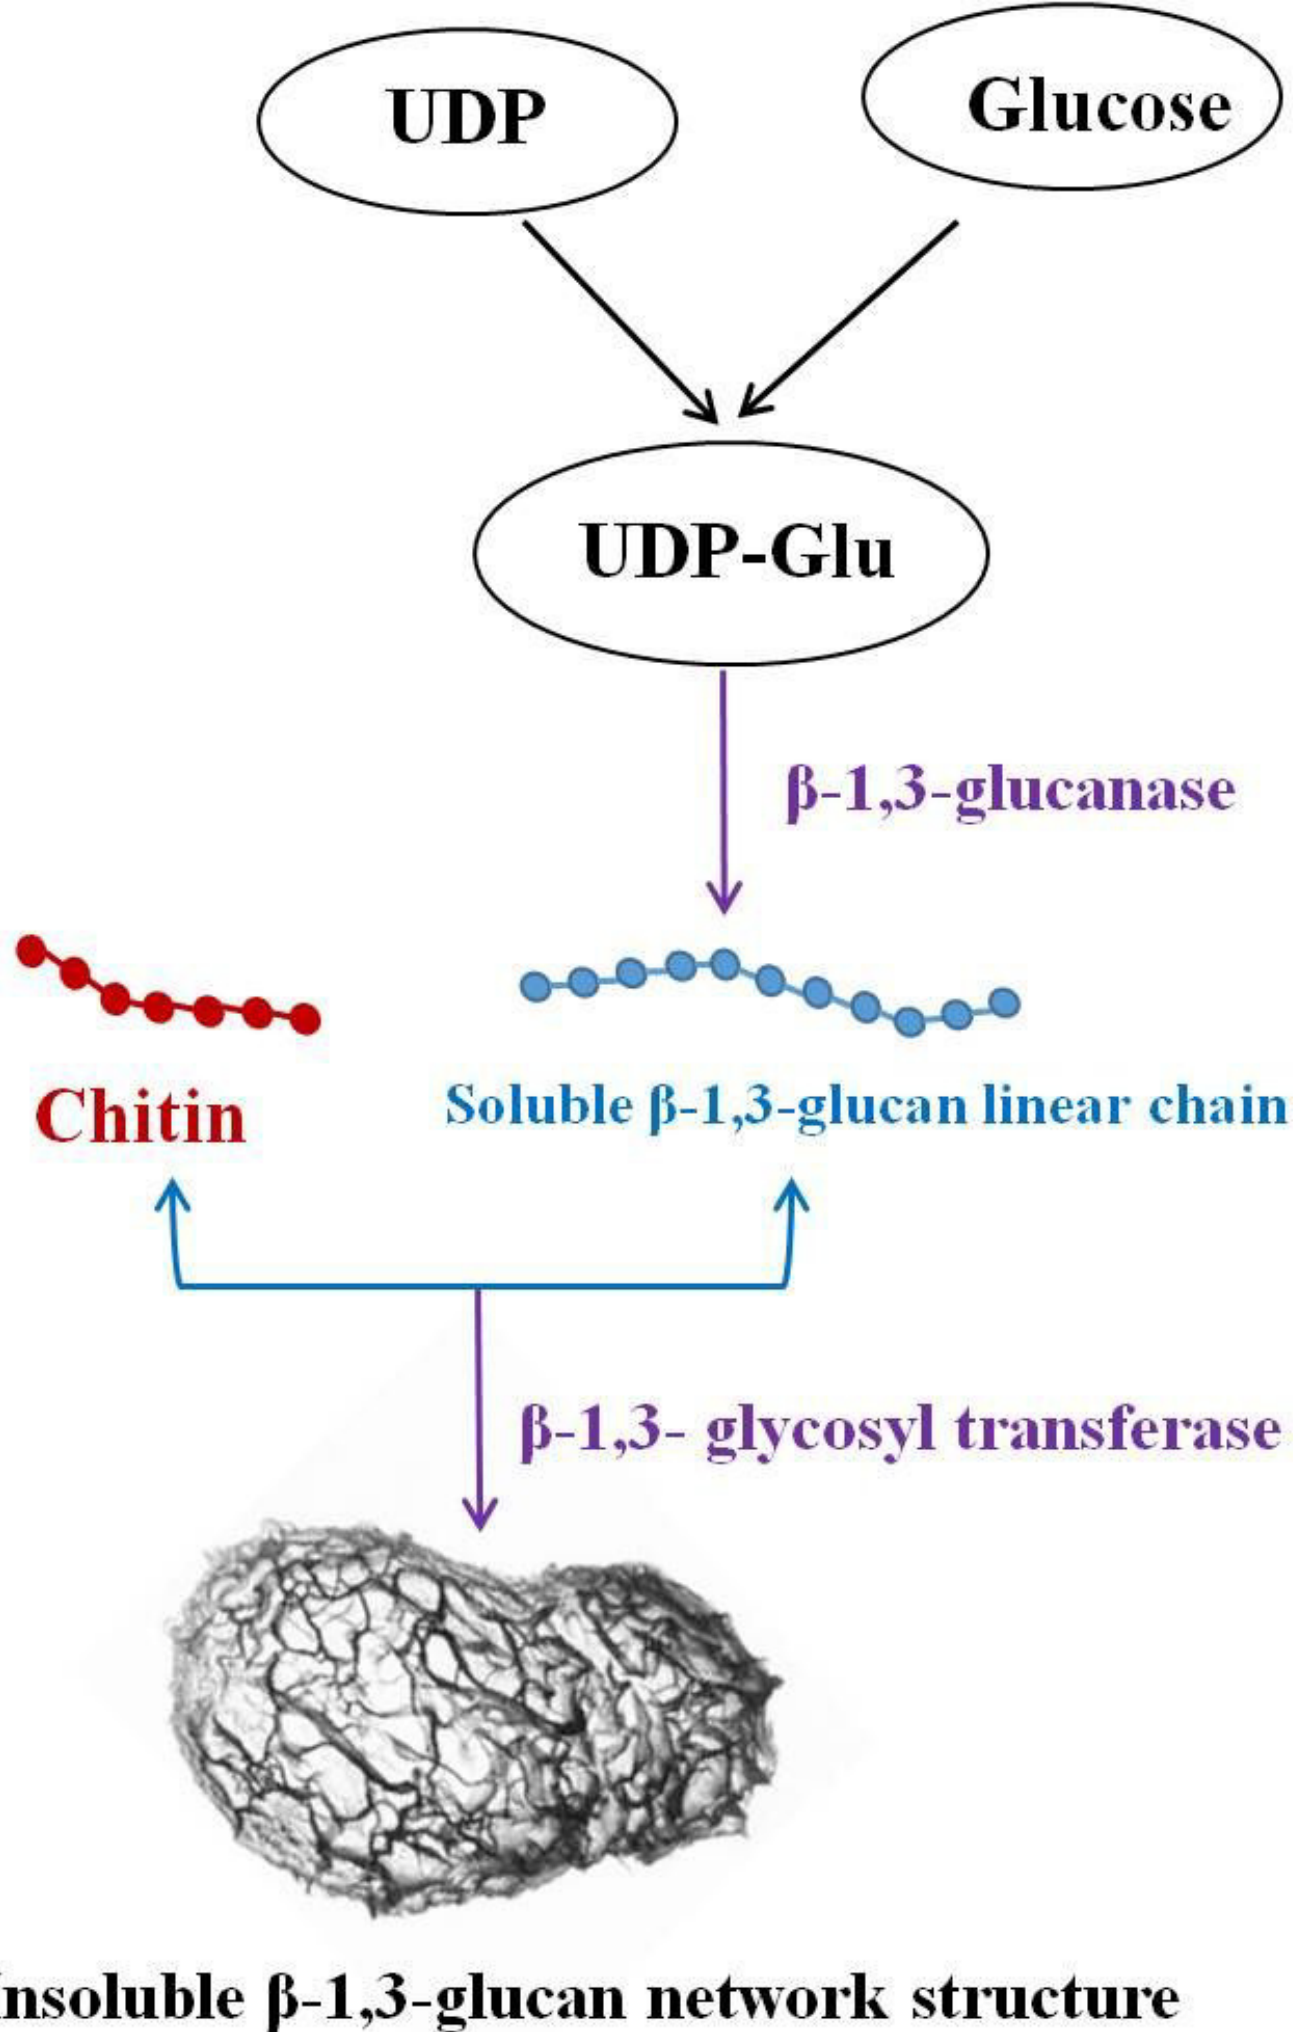

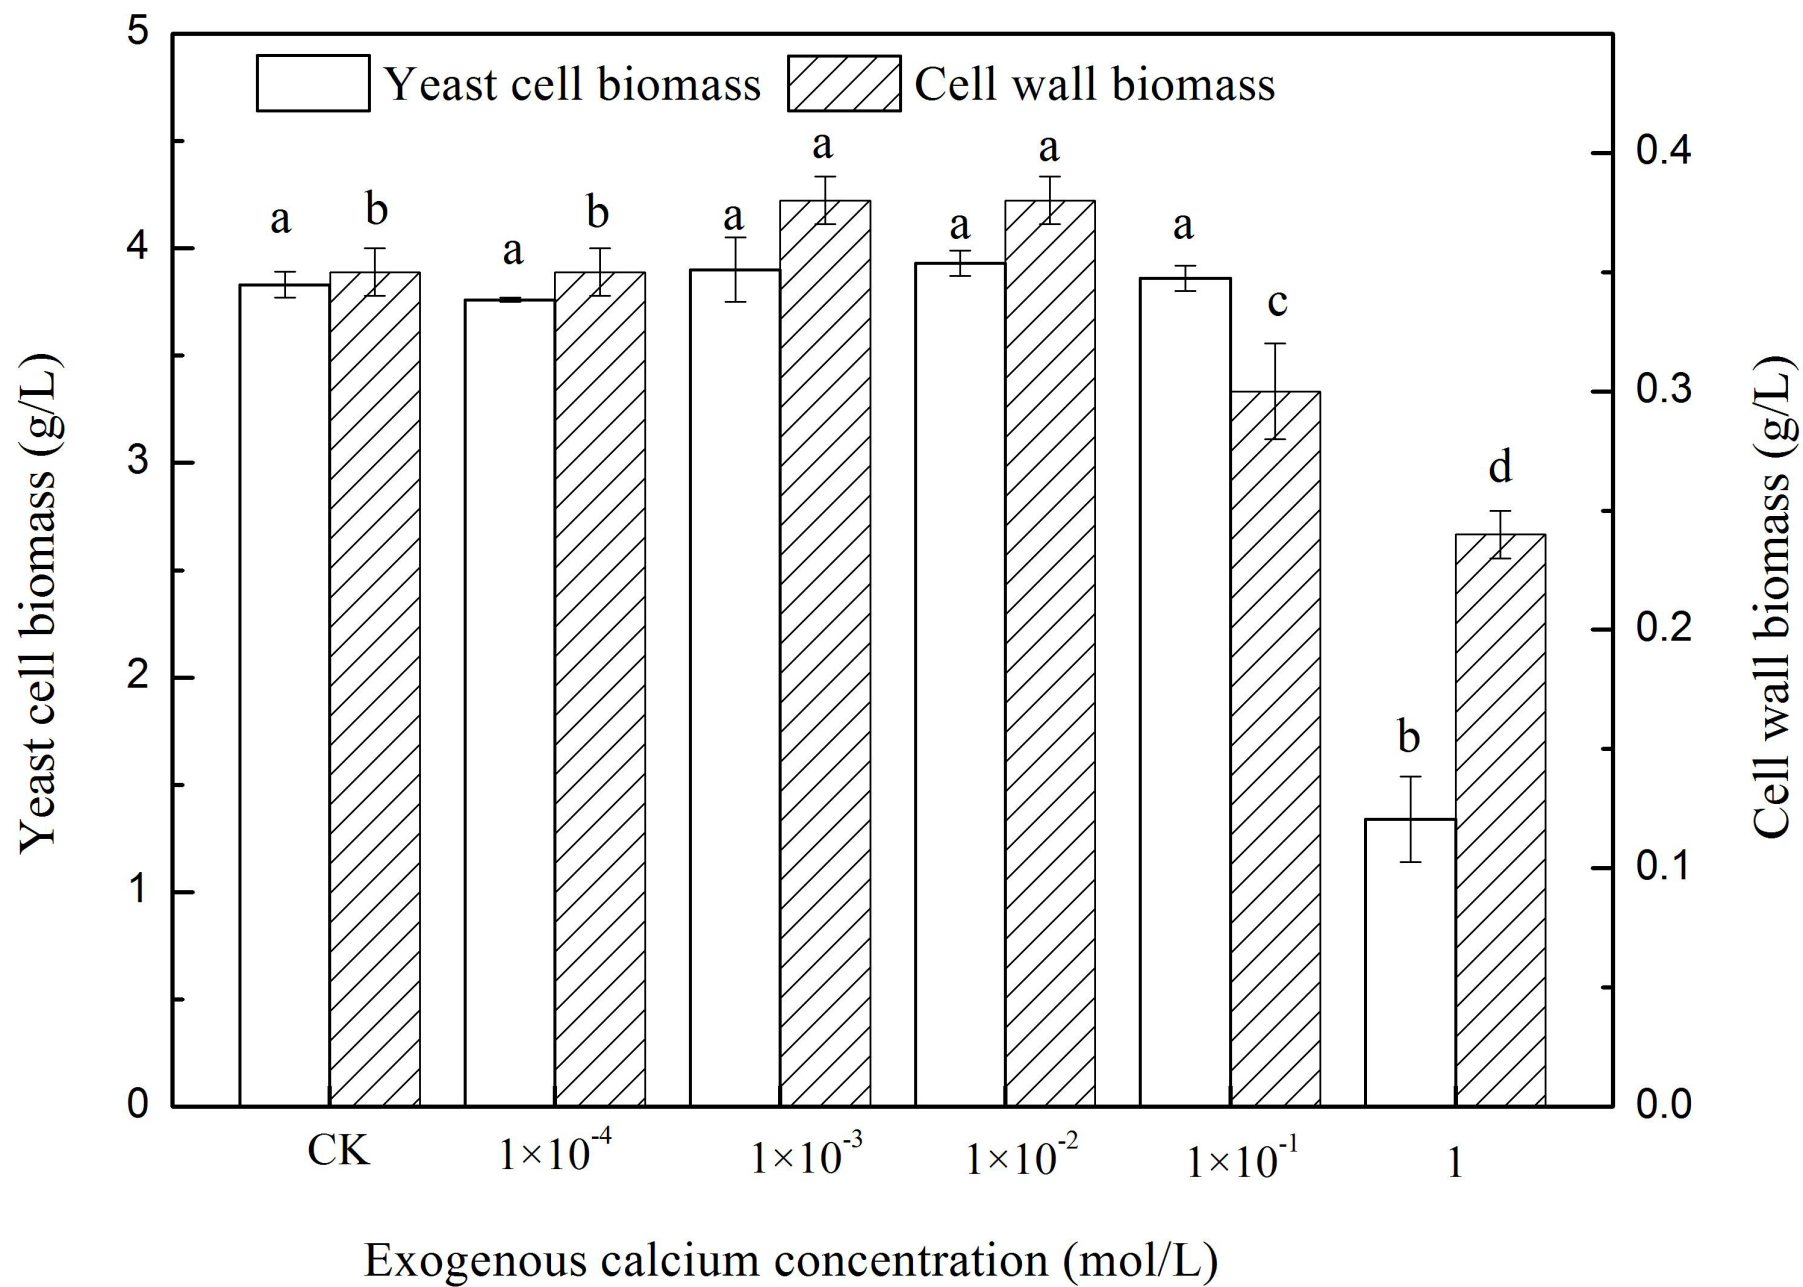



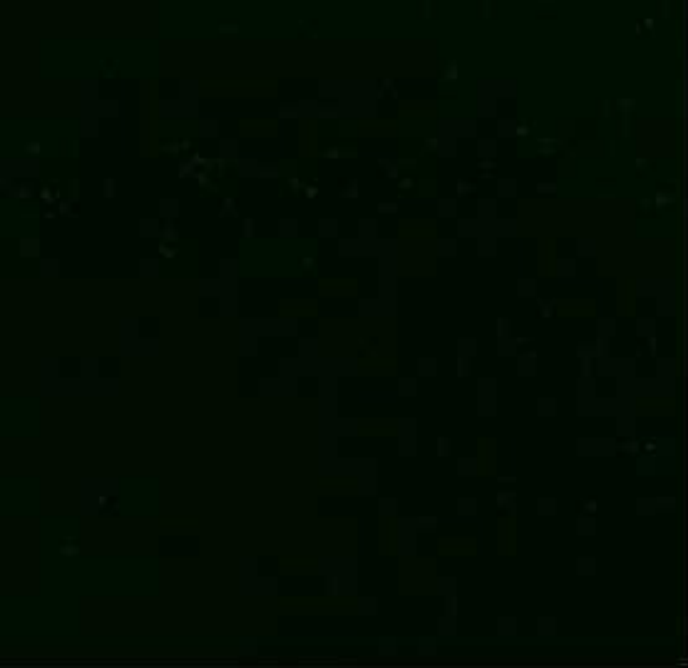

(a)

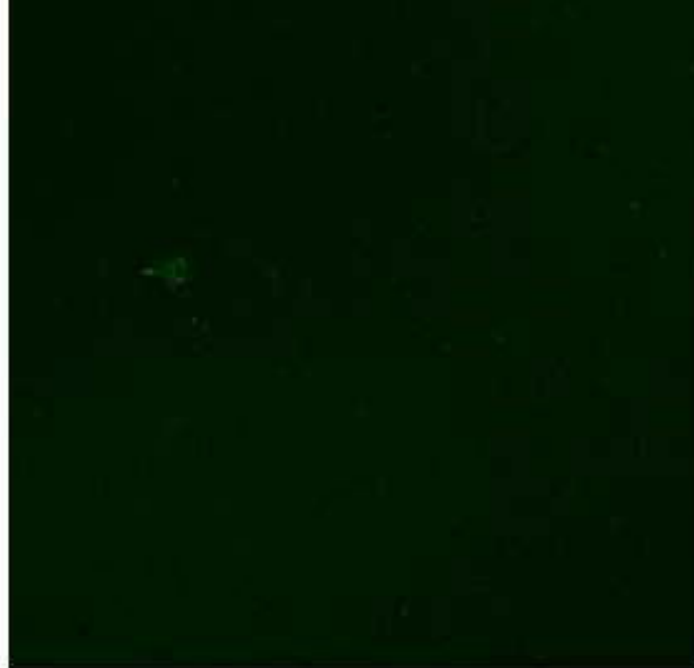

(b)

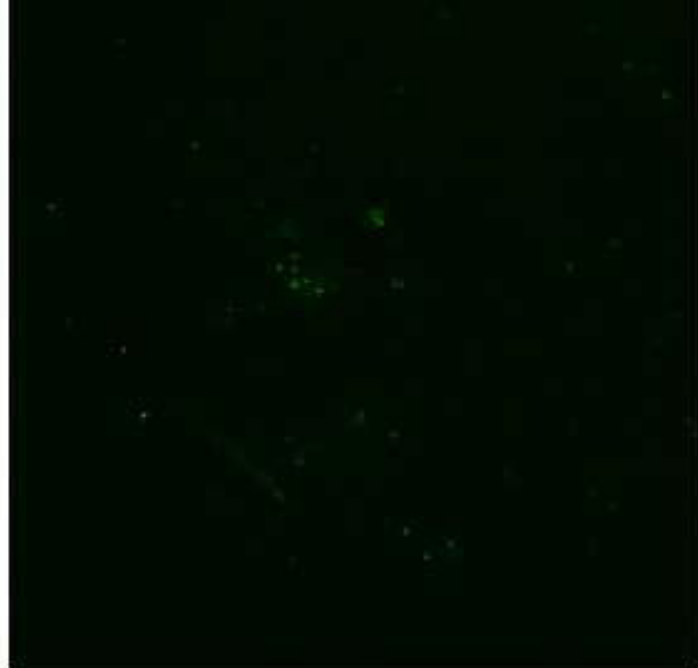

(c)

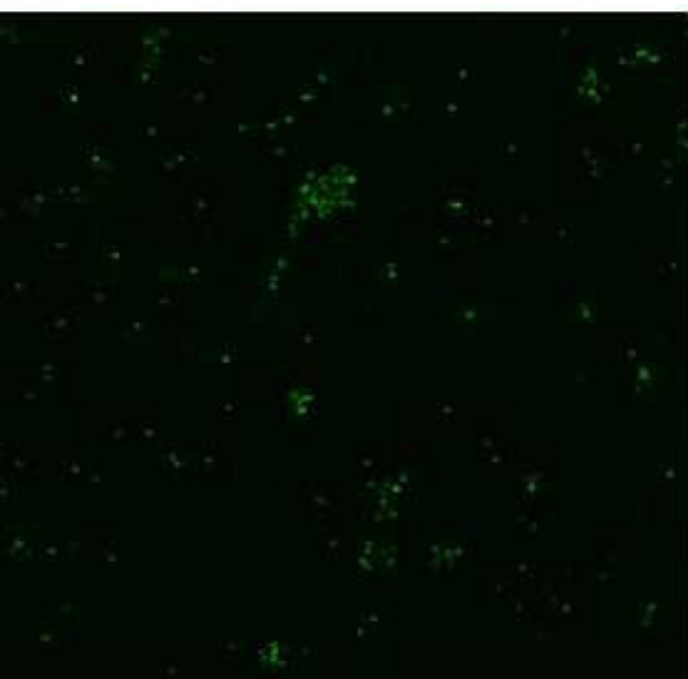

(d)

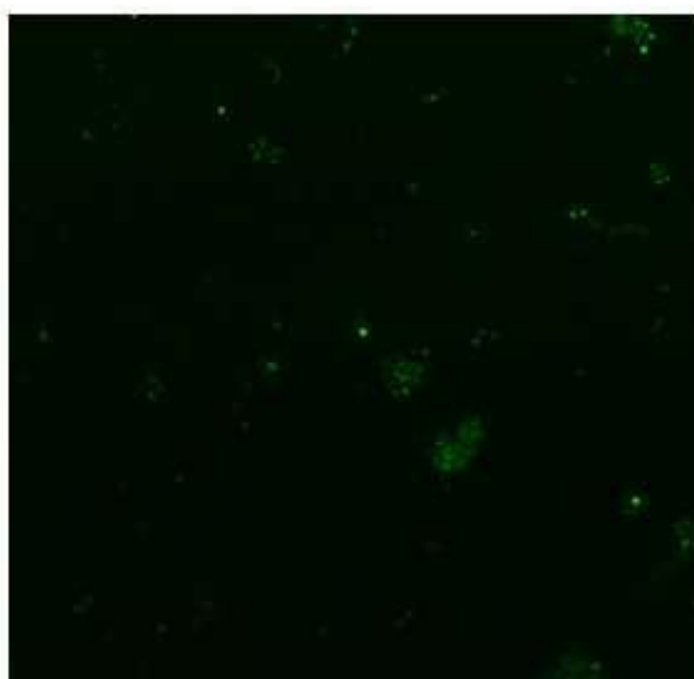

(e)

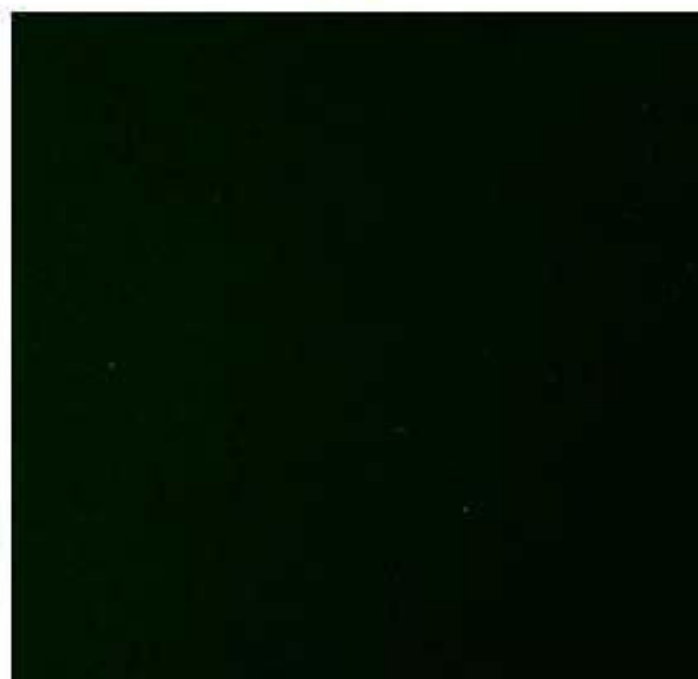

(f)

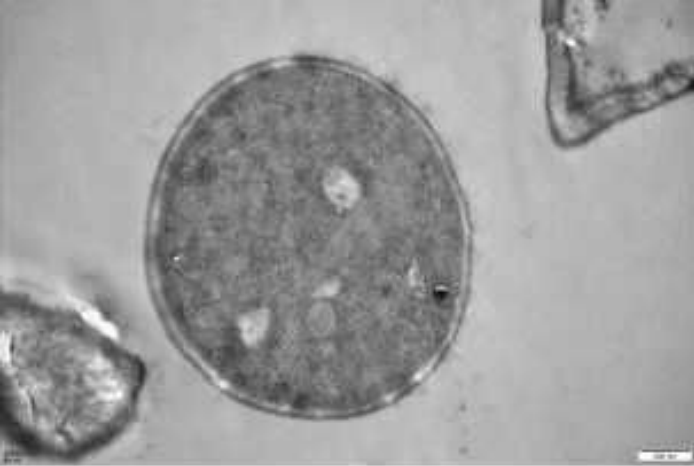

(a)

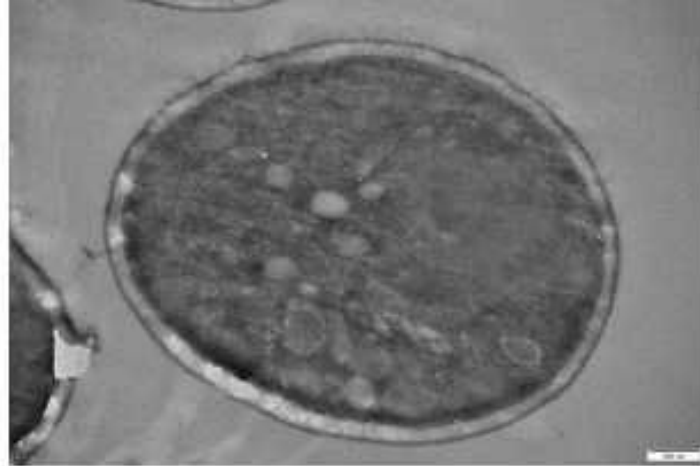

(b)

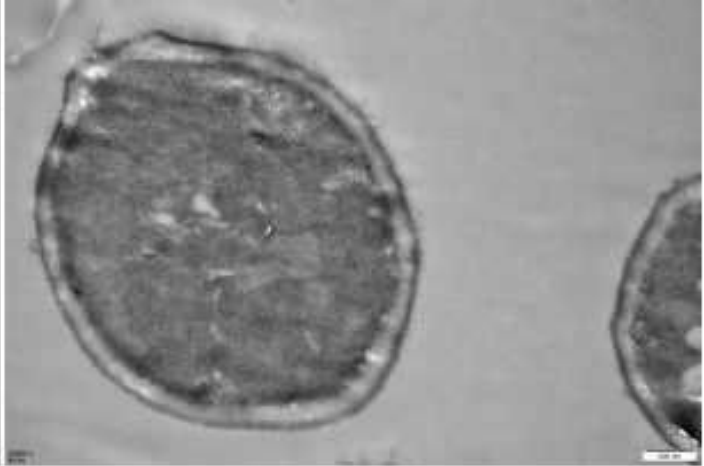

(c)

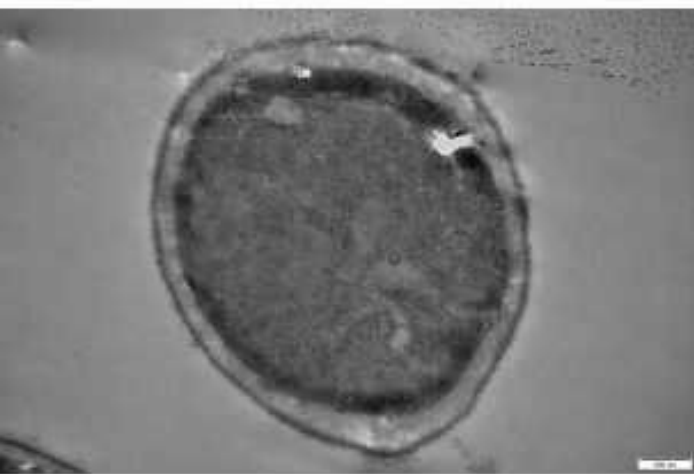

(d)

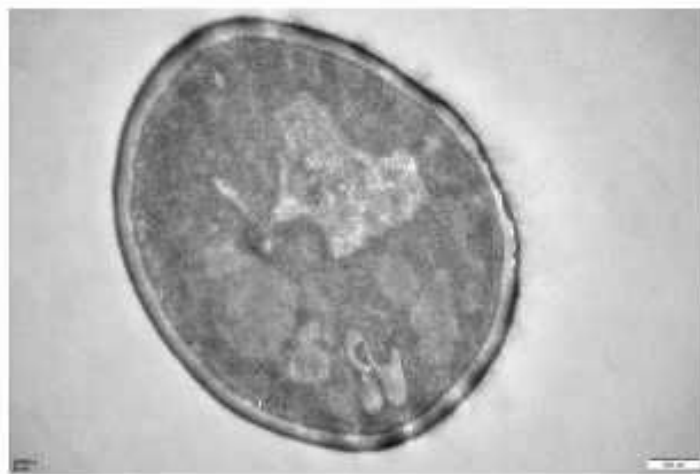

(e)

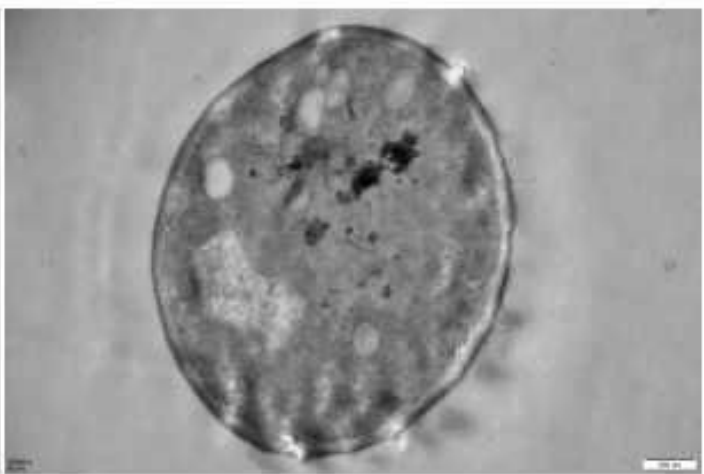

(f)

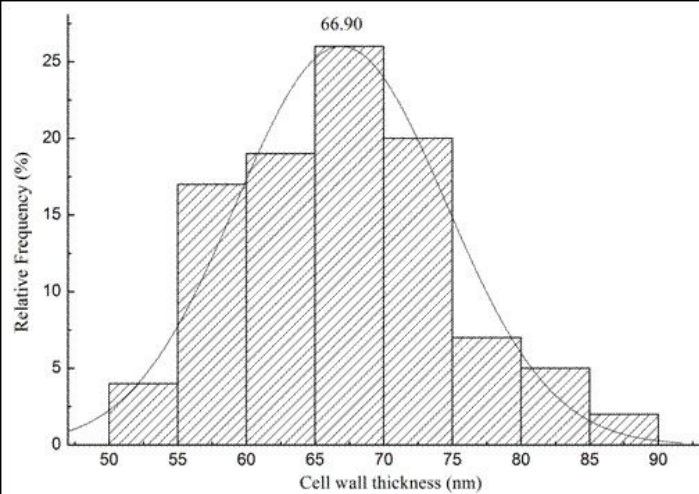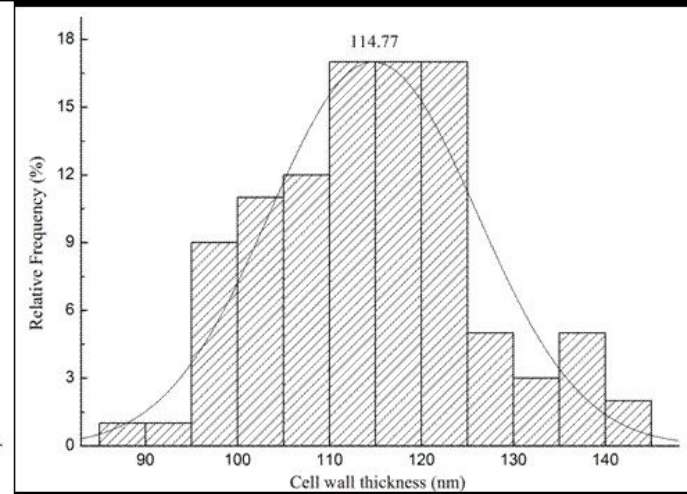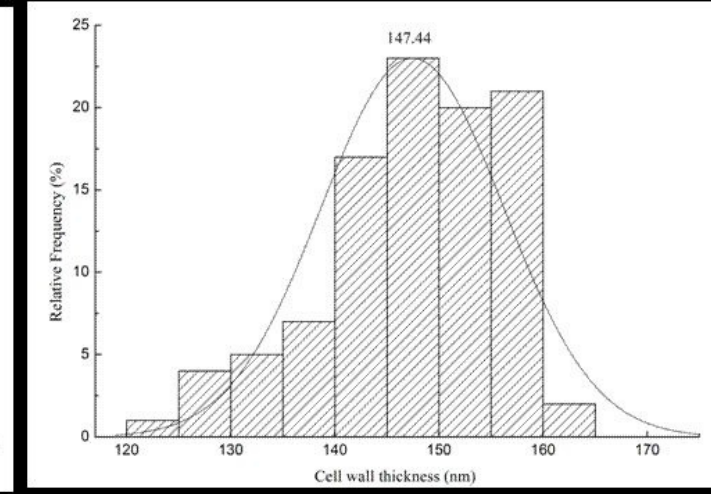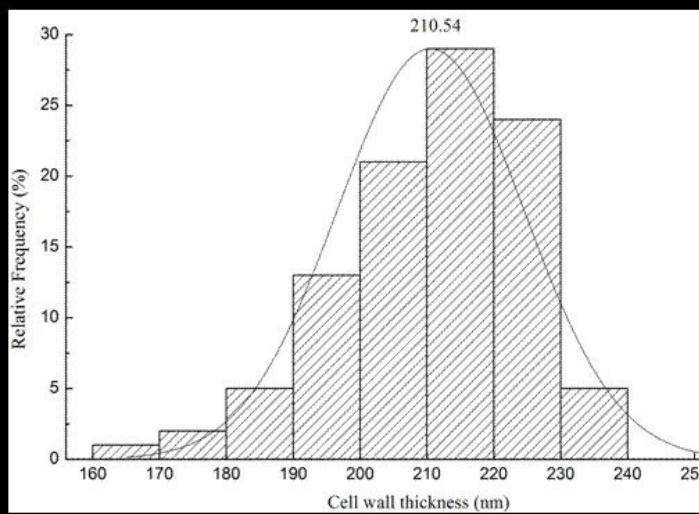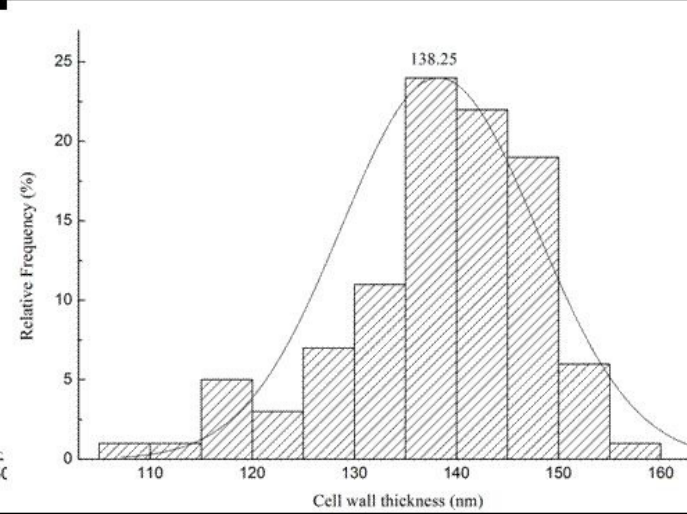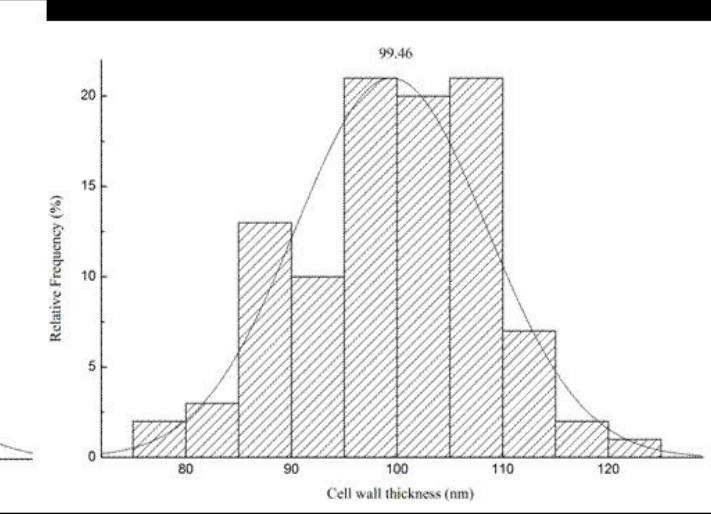

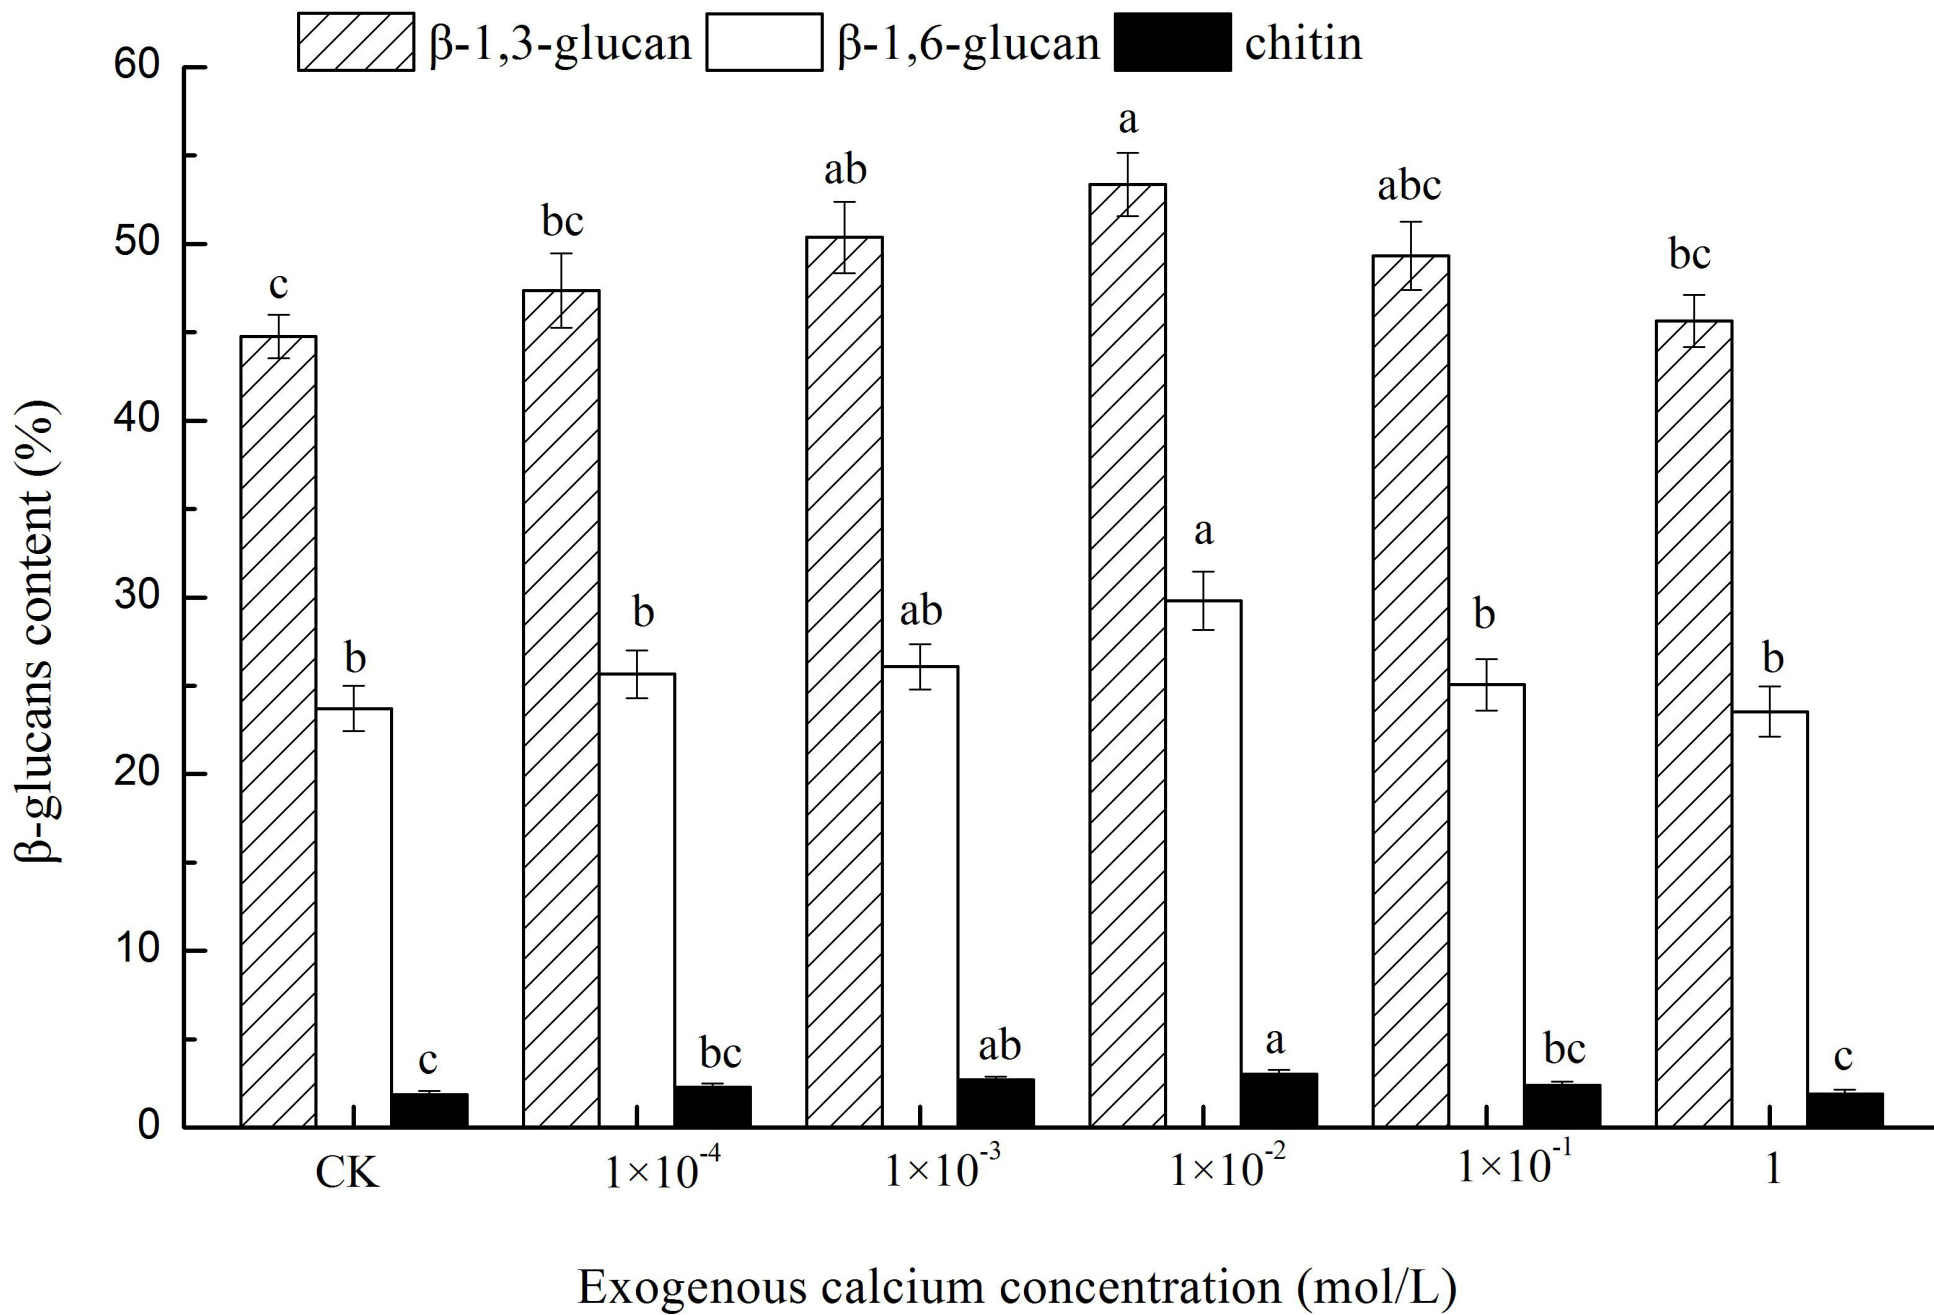

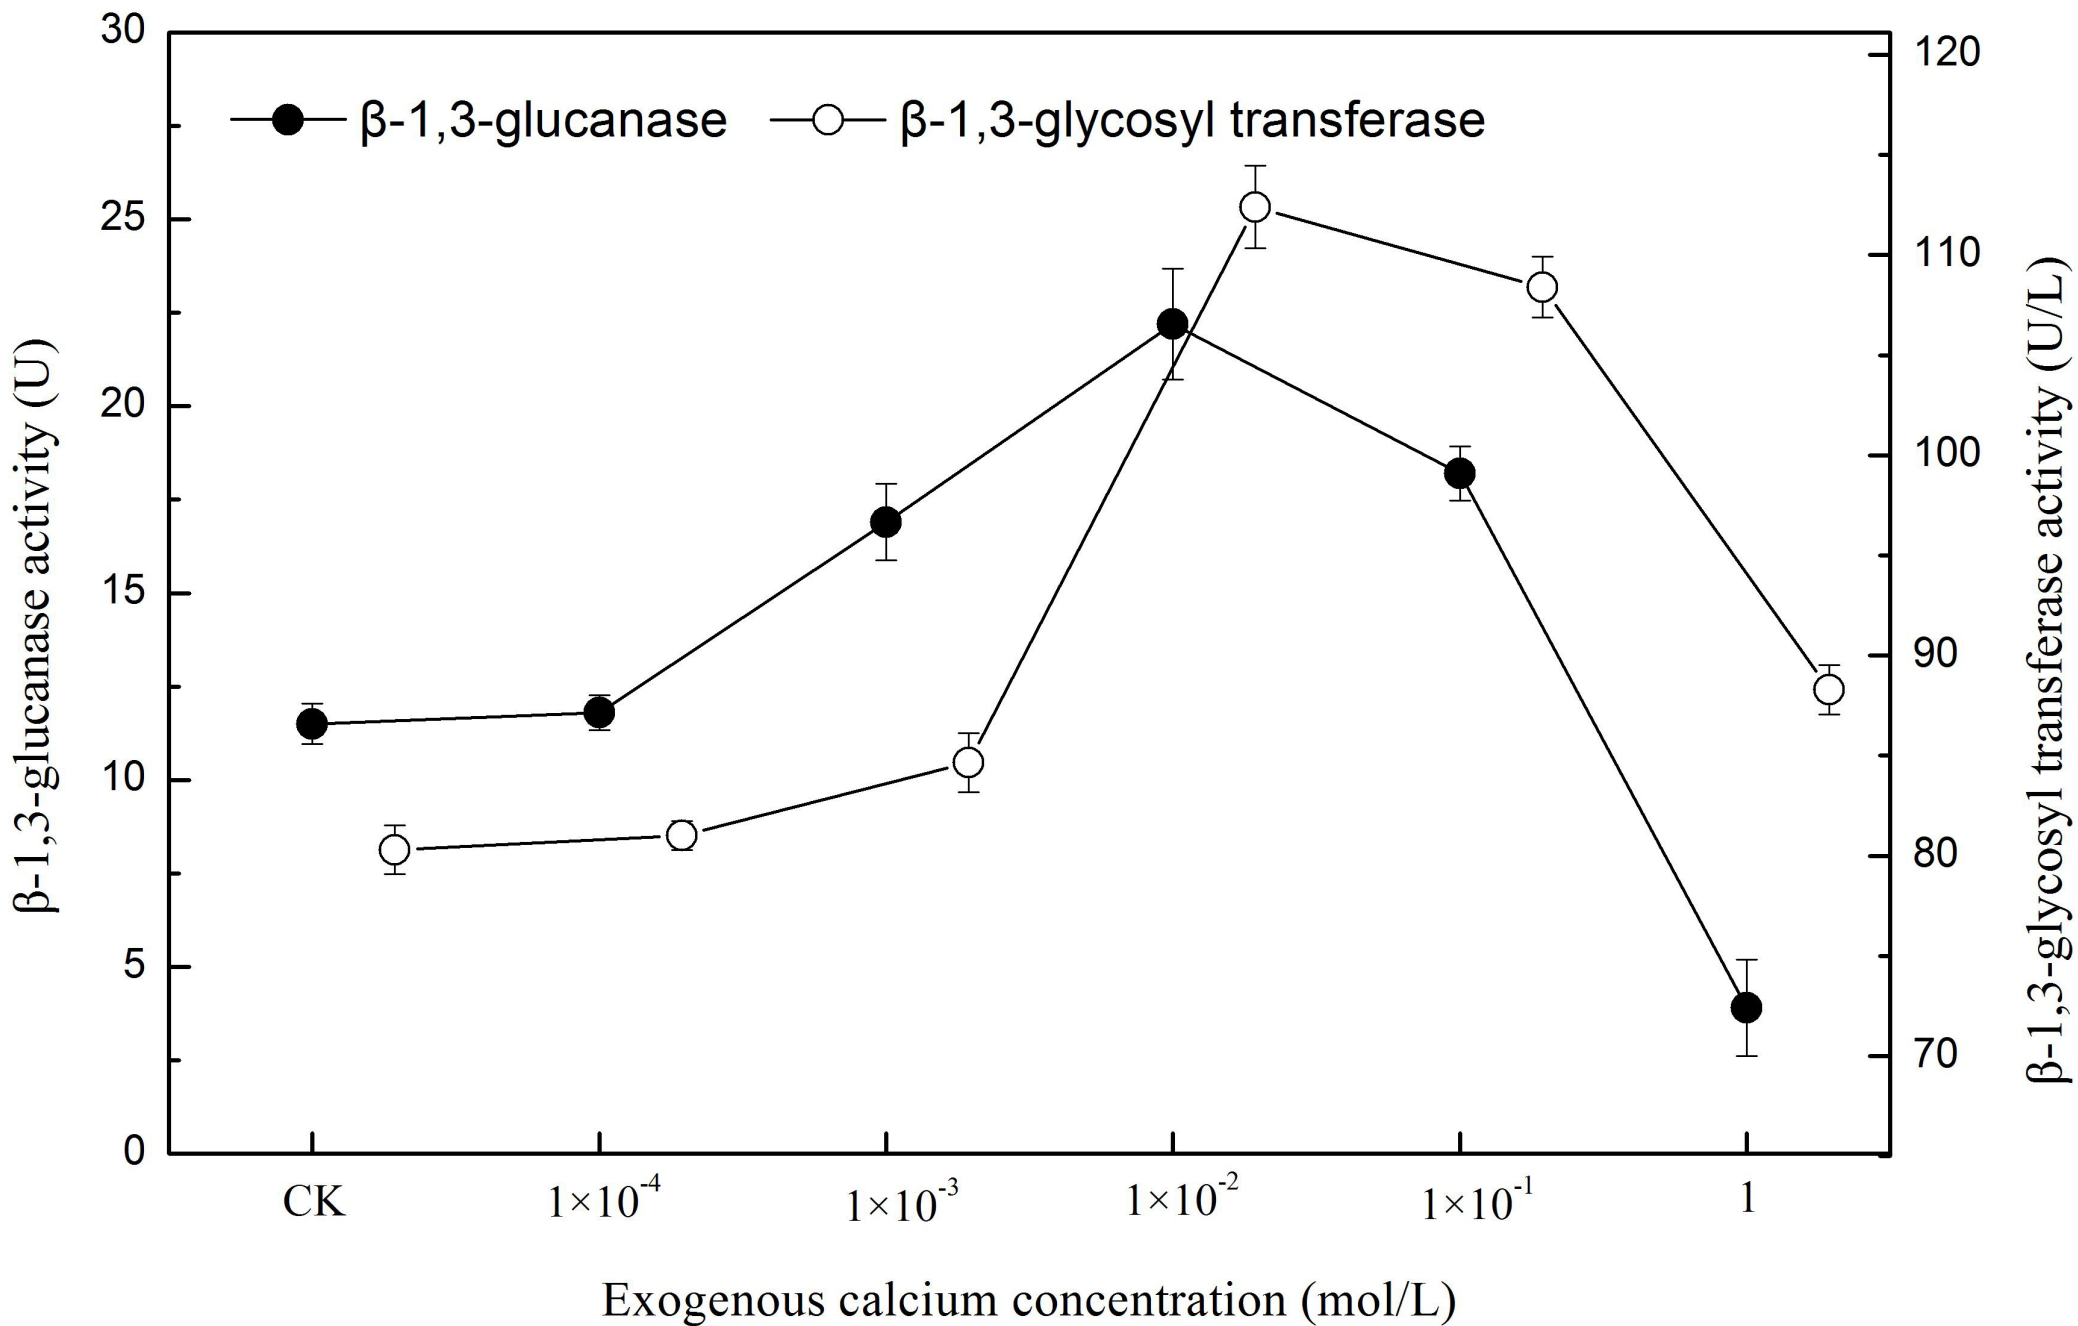

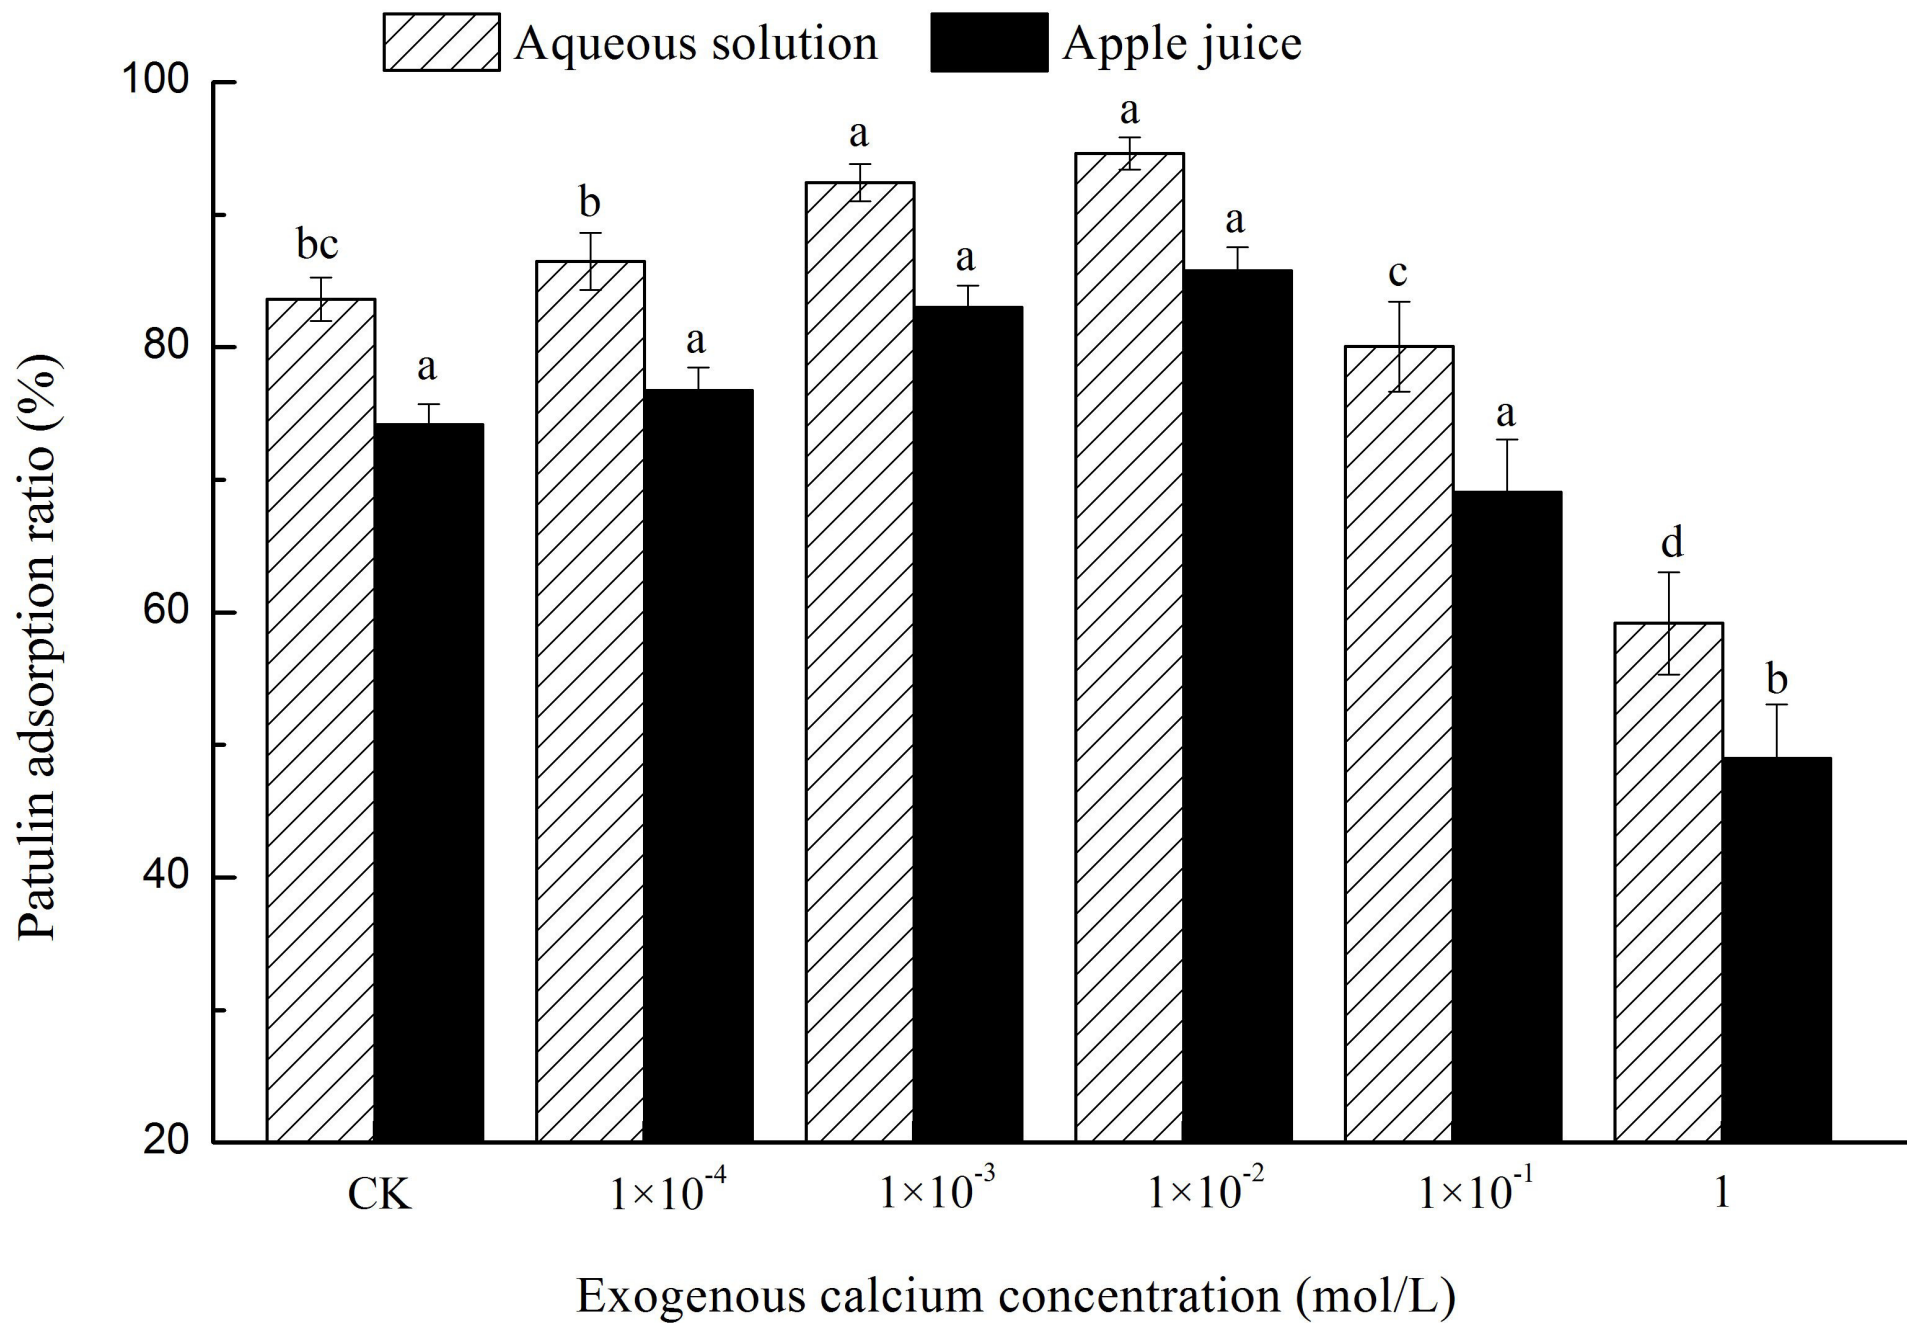

Source: http://biorxiv.org/content/10.1101/391573v1.full.pdf
